# Supplementary material
Source: Springer Nature journal article supplement (https://www.springerprofessional.de/resource/supplementary/13638_2014_974_MOESM10_ESM.pdf/11898900)

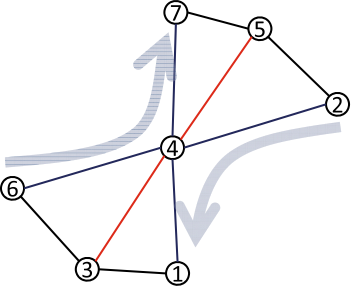

(a)

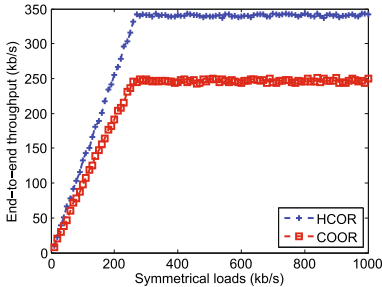

(b)

Supplement: MOESM10 [file 11898900]
